# Supplementary material for: Could Weaning Remodel the Oral Microbiota Composition in Donkeys? An Exploratory Study
Source: MDPI journal article supplement (doi:10.3390/ani12162024), 2022-08-10
Supplement: s1 [file s1]

**Table S1.** Differential KEGG metabolic pathways (pathway level 3) between postweaning and preweaning donkeys predicted by PICRUST

| Name    | Description                                         | PreW (%)  | PostW (%) | Fold Change<br>(PostW/PreW) | <i>p</i> -value |
|---------|-----------------------------------------------------|-----------|-----------|-----------------------------|-----------------|
| ko00010 | Glycolysis / Gluconeogenesis                        | 1.11±0.09 | 1.24±0.06 | 1.12                        | 0.030           |
| ko00620 | Pyruvate metabolism                                 | 1.17±0.03 | 1.24±0.03 | 1.06                        | 0.006           |
| ko00520 | Amino sugar and nucleotide sugar metabolism         | 0.94±0.07 | 1.02±0.05 | 1.09                        | 0.042           |
| ko00030 | Pentose phosphate pathway                           | 0.70±0.04 | 0.77±0.04 | 1.11                        | 0.028           |
| ko00250 | Alanine, aspartate and glutamate metabolism         | 0.79±0.03 | 0.75±0.03 | 0.95                        | 0.048           |
| ko00400 | Phenylalanine, tyrosine and tryptophan biosynthesis | 0.78±0.02 | 0.75±0.01 | 0.96                        | 0.010           |
| ko01210 | 2-Oxocarboxylic acid metabolism                     | 0.82±0.03 | 0.74±0.03 | 0.90                        | 0.008           |
| ko00061 | Fatty acid biosynthesis                             | 0.58±0.01 | 0.60±0.01 | 1.04                        | 0.023           |
| ko00051 | Fructose and mannose metabolism                     | 0.48±0.07 | 0.56±0.04 | 1.17                        | 0.042           |
| ko00330 | Arginine and proline metabolism                     | 0.42±0.03 | 0.48±0.05 | 1.13                        | 0.042           |
| ko01501 | beta-Lactam resistance                              | 0.47±0.05 | 0.43±0.03 | 0.93                        | 0.048           |
| ko00670 | One carbon pool by folate                           | 0.46±0.01 | 0.43±0.02 | 0.93                        | 0.018           |
| ko04112 | Cell cycle - Caulobacter                            | 0.46±0.02 | 0.43±0.01 | 0.95                        | 0.030           |
| ko00220 | Arginine biosynthesis                               | 0.46±0.02 | 0.42±0.03 | 0.92                        | 0.037           |
| ko00561 | Glycerolipid metabolism                             | 0.35±0.05 | 0.41±0.04 | 1.18                        | 0.037           |
| ko00760 | Nicotinate and nicotinamide metabolism              | 0.46±0.03 | 0.41±0.04 | 0.88                        | 0.036           |
| ko00910 | Nitrogen metabolism                                 | 0.41±0.04 | 0.36±0.03 | 0.88                        | 0.042           |
| ko04066 | HIF-1 signaling pathway                             | 0.27±0.03 | 0.31±0.02 | 1.15                        | 0.036           |
| ko04922 | Glucagon signaling pathway                          | 0.24±0.03 | 0.28±0.02 | 1.18                        | 0.030           |
| ko05230 | Central carbon metabolism in cancer                 | 0.21±0.03 | 0.26±0.01 | 1.24                        | 0.021           |
| ko01523 | Antifolate resistance                               | 0.19±0.01 | 0.18±0.01 | 0.94                        | 0.048           |
| ko00473 | D-Alanine metabolism                                | 0.13±0.02 | 0.17±0.03 | 1.24                        | 0.048           |
| ko00750 | Vitamin B6 metabolism                               | 0.19±0.01 | 0.17±0.01 | 0.90                        | 0.037           |

---

|         |                                                 |           |           |      |       |
|---------|-------------------------------------------------|-----------|-----------|------|-------|
| ko04213 | Longevity regulating pathway - multiple species | 0.13±0.01 | 0.14±0.01 | 1.13 | 0.028 |
| ko05150 | Staphylococcus aureus infection                 | 0.07±0.04 | 0.13±0.04 | 1.82 | 0.030 |
| ko00471 | D-Glutamine and D-glutamate metabolism          | 0.14±0.01 | 0.13±0.01 | 0.95 | 0.037 |
| ko00625 | Chloroalkane and chloroalkene degradation       | 0.09±0.02 | 0.12±0.01 | 1.34 | 0.037 |
| ko05418 | Fluid shear stress and atherosclerosis          | 0.14±0.01 | 0.12±0.01 | 0.84 | 0.030 |
| ko00785 | Lipoic acid metabolism                          | 0.09±0.01 | 0.11±0.01 | 1.16 | 0.023 |
| ko02025 | Biofilm formation - Pseudomonas aeruginosa      | 0.14±0.02 | 0.11±0.01 | 0.81 | 0.048 |
| ko05014 | Amyotrophic lateral sclerosis (ALS)             | 0.08±0.01 | 0.10±0.01 | 1.20 | 0.030 |
| ko04626 | Plant-pathogen interaction                      | 0.12±0.01 | 0.10±0.01 | 0.83 | 0.023 |

---

PreW, preweaning group; PostW, postweaning group.

**Table S2.** Differential KEGG modules between postweaning and preweaning donkeys predicted by PICRUST

| Name   | Description                                                                        | PreW(%)   | PostW(%)  | Fold Change<br>(PostW/PreW) | <i>p</i> -value |
|--------|------------------------------------------------------------------------------------|-----------|-----------|-----------------------------|-----------------|
| M00004 | Pentose phosphate pathway (Pentose phosphate cycle)                                | 1.33±0.05 | 1.42±0.04 | 1.07                        | 0.023           |
| M00006 | Pentose phosphate pathway, oxidative phase, glucose 6P => ribulose 5P              | 1.07±0.08 | 1.19±0.09 | 1.12                        | 0.044           |
| M00025 | Tyrosine biosynthesis, chorismate => tyrosine                                      | 1.11±0.05 | 1.18±0.03 | 1.06                        | 0.041           |
| M00028 | Ornithine biosynthesis, glutamate => ornithine                                     | 0.64±0.15 | 0.91±0.12 | 1.41                        | 0.027           |
| M00035 | Methionine degradation                                                             | 0.82±0.05 | 0.89±0.06 | 1.09                        | 0.044           |
| M00045 | Histidine degradation, histidine => N-formiminoglutamate => glutamate              | 0.54±0.11 | 0.72±0.11 | 1.32                        | 0.028           |
| M00082 | Fatty acid biosynthesis, initiation                                                | 0.59±0.04 | 0.52±0.05 | 0.88                        | 0.028           |
| M00083 | Fatty acid biosynthesis, elongation                                                | 0.30±0.13 | 0.50±0.13 | 1.69                        | 0.048           |
| M00093 | Phosphatidylethanolamine (PE) biosynthesis, PA => PS => PE                         | 1.09±0.37 | 0.47±0.27 | 0.43                        | 0.037           |
| M00116 | Menaquinone biosynthesis, chorismate => menaquinol                                 | 0.35±0.05 | 0.44±0.02 | 1.24                        | 0.012           |
| M00124 | Pyridoxal biosynthesis, erythrose-4P => pyridoxal-5P                               | 0.24±0.13 | 0.42±0.14 | 1.77                        | 0.048           |
| M00144 | NADH:quinone oxidoreductase, prokaryotes                                           | 0.64±0.09 | 0.42±0.13 | 0.66                        | 0.028           |
| M00155 | Cytochrome c oxidase, prokaryotes                                                  | 0.41±0.03 | 0.39±0.01 | 0.95                        | 0.044           |
| M00307 | Pyruvate oxidation, pyruvate => acetyl-CoA                                         | 0.22±0.08 | 0.36±0.08 | 1.61                        | 0.044           |
| M00367 | C10-C20 isoprenoid biosynthesis, non-plant eukaryotes                              | 0.39±0.05 | 0.30±0.04 | 0.78                        | 0.023           |
| M00580 | Pentose phosphate pathway, archaea, fructose 6P => ribose 5P                       | 0.13±0.08 | 0.29±0.11 | 2.15                        | 0.031           |
| M00569 | Catechol meta-cleavage, catechol => acetyl-CoA / 4-methylcatechol => propanoyl-CoA | 0.19±0.06 | 0.29±0.07 | 1.50                        | 0.048           |
| M00416 | Cytochrome aa3-600 menaquinol oxidase                                              | 0.37±0.06 | 0.29±0.04 | 0.79                        | 0.048           |
| M00609 | Cysteine biosynthesis, methionine => cysteine                                      | 0.17±0.06 | 0.28±0.05 | 1.61                        | 0.028           |
| M00725 | Cationic antimicrobial peptide (CAMP) resistance, dltABCD operon                   | 0.25±0.02 | 0.22±0.02 | 0.87                        | 0.041           |
| M00842 | Tetrahydrobiopterin biosynthesis, GTP => BH4                                       | 0.25±0.02 | 0.22±0.02 | 0.87                        | 0.041           |
| M00843 | L-threo-Tetrahydrobiopterin biosynthesis, GTP => L-threo-BH4                       | 0.38±0.13 | 0.21±0.09 | 0.55                        | 0.041           |
| M00845 | Arginine biosynthesis, glutamate => acetylcitrulline => arginine                   | 0.08±0.03 | 0.13±0.02 | 1.56                        | 0.044           |

PreW, preweaning group; PostW, postweaning group.
